# Supplementary material
Source: publisher figshare collection journal article supplement (https://springernature.figshare.com/ndownloader/files/7204433)
Supplement: Supplementary file [file 7204433]

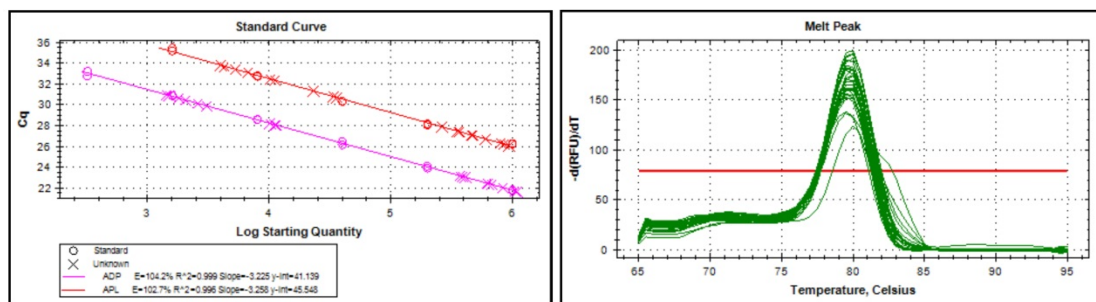

## Glucose-1-phosphate adenylyltransferase

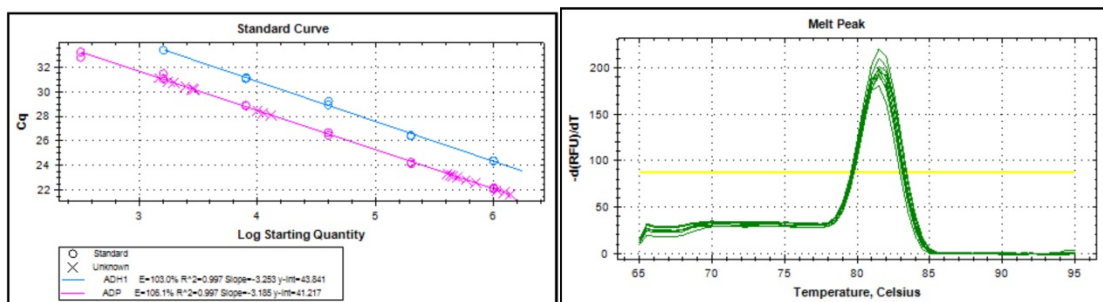

## Alcohol dehydrogenase

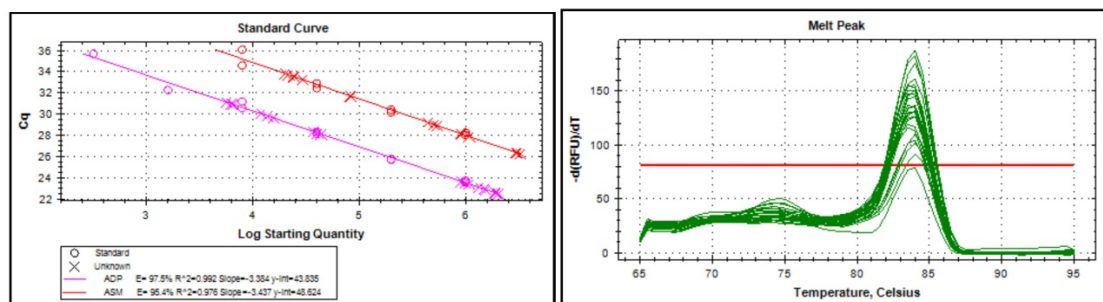

## DNA binding / transcription factor

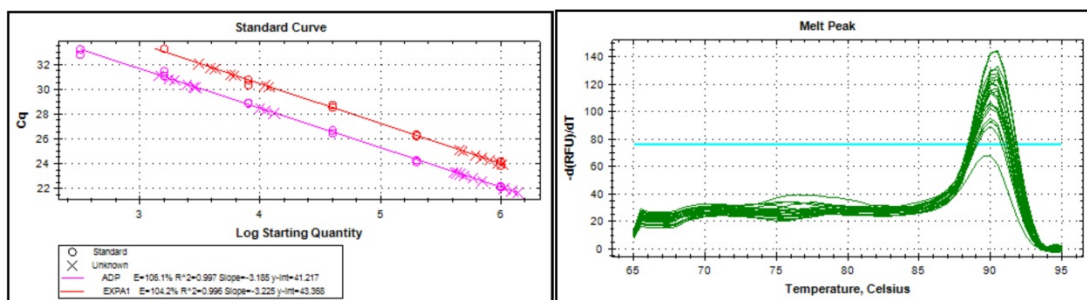

## Expansin A1

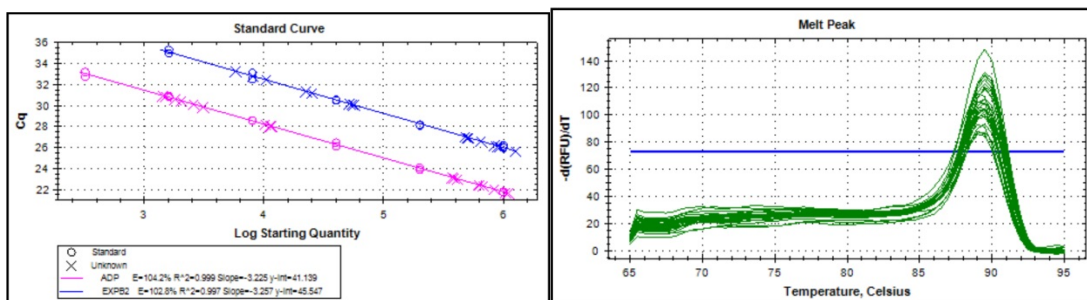

Expansin B2

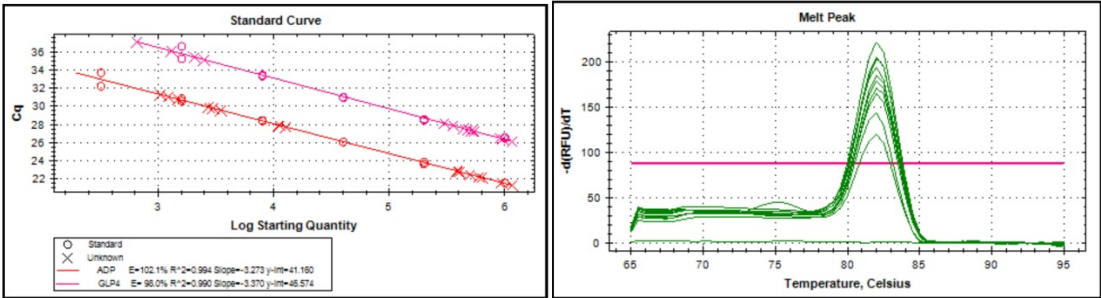

Germin-like protein 4

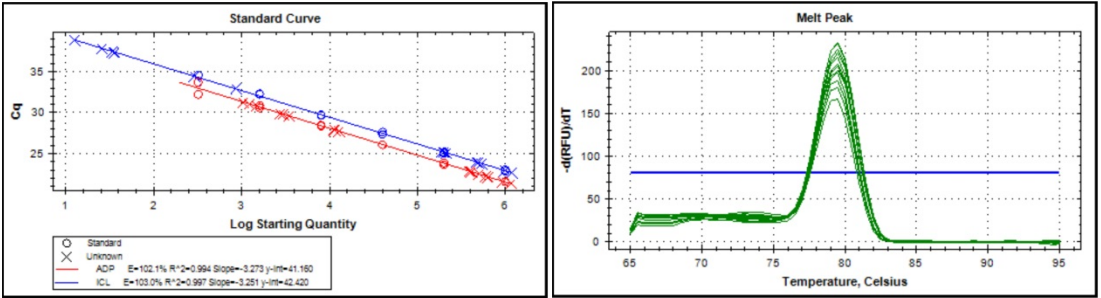

Nucleotide-sensitive chloride conductance regulator family protein

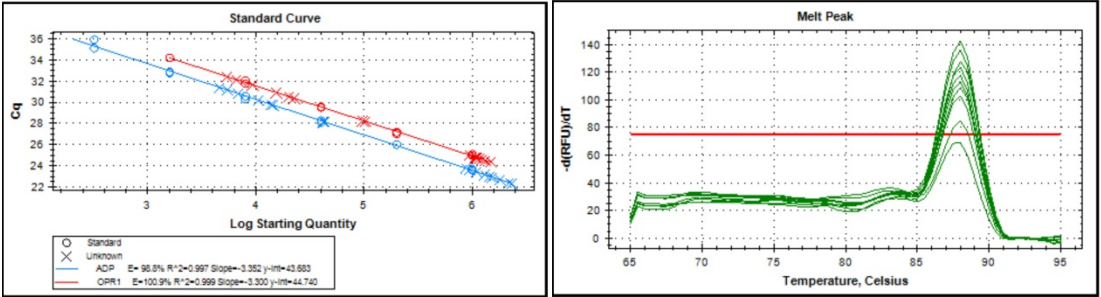

12-oxophytodienoate reductase 1

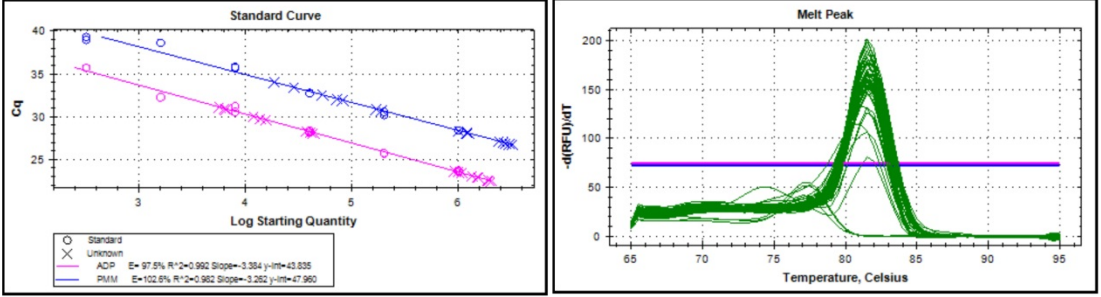

Phosphomannomutase
